# Supplementary material for: Synthesis of periodic mesoporous organosilicas with incorporated aluminium
Source: Royal Society of Chemistry journal article supplement (doi:10.1039/b510700h), 2005-01-01
Supplement: b510700h.pdf [file b510700h.pdf]

# Synthesis of Periodic Mesoporous Organosilicas with Incorporated Aluminium

Benjamin J. Hughes, Jean-Baptiste Guilbaud, Mathieu Allix and Yaroslav Z. Khimyak\*

*<sup>a</sup> Molecular Materials Centre, Department of Chemistry, University of Liverpool, Liverpool, L69 7ZD, United Kingdom. Fax: 0151 794 3587; Tel: 0151 794 3535; E-mail: khimyak@liv.ac.uk*

## Electronic Supplementary Information

**Figure S1.** Powder X-ray diffraction patterns of as-synthesised Al-CH<sub>2</sub>-CH<sub>2</sub>-PMO with different Si/Al ratios.

**Figure S2.** <sup>27</sup>Al MAS NMR spectra of Al-CH<sub>2</sub>-CH<sub>2</sub>-PMOs (as-synthesised) with different Si/Al ratios.

**Figure S3.** <sup>1</sup>H-<sup>29</sup>Si MAS NMR spectra of as-synthesised Al-CH<sub>2</sub>-CH<sub>2</sub>-PMOs with different Si/Al ratios.

Identification of acidic sites by FTIR spectroscopy of adsorbed pyridine.

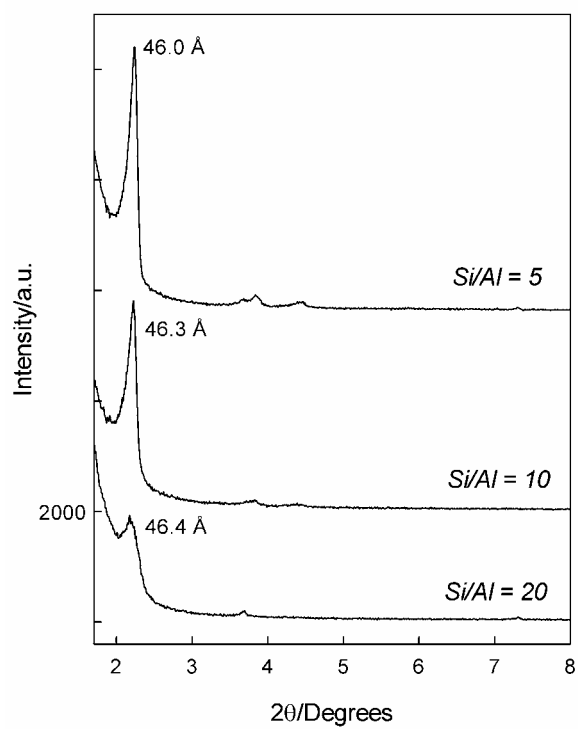

**Figure S1.** Powder X-ray diffraction patterns of as-synthesised Al-CH<sub>2</sub>-CH<sub>2</sub>-PMO with different Si/Al ratios.

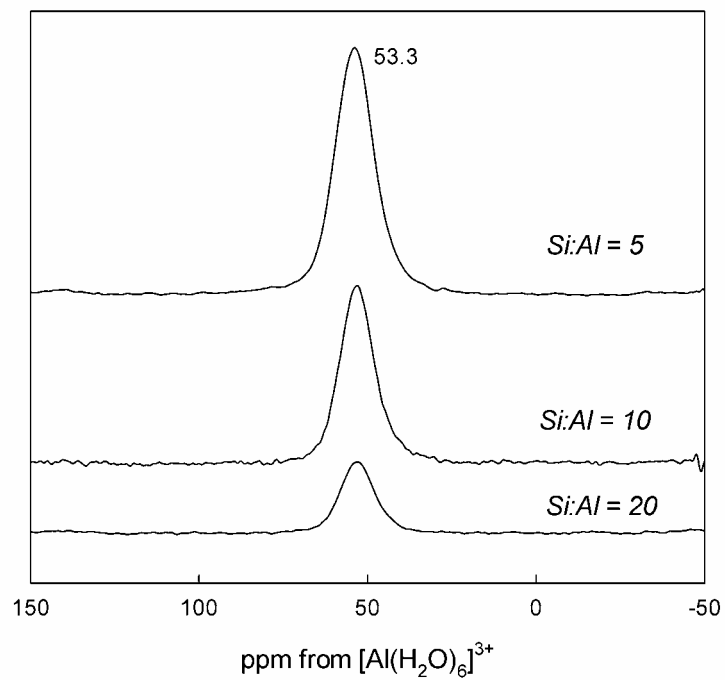

**Figure S2.**  $^{27}\text{Al}$  MAS NMR spectra of Al-CH<sub>2</sub>-CH<sub>2</sub>-PMOs (as-synthesised) with different Si/Al ratios.

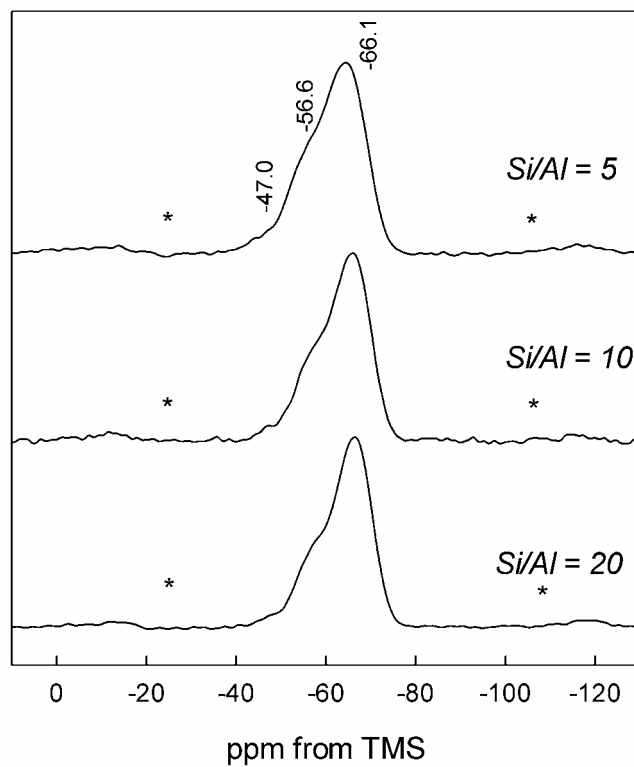

**Figure S3.**  $^1\text{H}$ - $^{29}\text{Si}$  MAS NMR spectra of as-synthesised Al-CH<sub>2</sub>-CH<sub>2</sub>-PMOs with different Si/Al ratios.

### **Identification of acidic sites by FTIR spectroscopy of adsorbed pyridine**

The adsorption of pyridine was carried on the Al-CH<sub>2</sub>-CH<sub>2</sub>-PMO with different contents of Al. The solids were thermally treated at 150°C for 24 hours before the adsorption of pyridine. The solids were pressed with KBr into the pellets (KBr was calcined at 550°C for 24 hours before use). The spectra were recorded on a PerkinElmer FTIR spectrometer.

The spectra of pyridine adsorbed on a Al-CH<sub>2</sub>-CH<sub>2</sub>-PMOs show the presence of several bands. The lines at 1540<sub>(m.)</sub> and 1640<sub>(m.)</sub> cm<sup>-1</sup> registered for the samples with different Al-contents are indicative of pyridine bound to Bronsted acidic sites, while the line at *ca.* 1490<sub>(s.)</sub> cm<sup>-1</sup> can be ascribed to the pyridine bound to both Bronsted and Lewis acidic sites. The intense peak at 1444<sub>(s.)</sub> cm<sup>-1</sup> is attributable to the H-bonded pyridine typical of the silica based molecular sieves.
